# Supplementary material
Source: MDPI journal article supplement (https://www.mdpi.com/2071-1050/15/16/12122)
Supplement: s1 [file s1 › sustainability-2505256-supplementary.pdf]

## **Questionnaire**

### **Knowledge management process**

#### ***Knowledge creating***

Our organization generates best practices from previous projects to improve future projects

Employees in the organization develop new ideas through constructive dialogues

Employees in the organization cooperate with each other when developing new ideas

#### ***Knowledge acquisition***

Managers try to find out what is the real attitude of employees towards work

The organization holds regular meetings where the needs of our employees are discussed

Employees in the organization are encouraged to be innovative

The management of the organization encourages employees to educate themselves and improve

#### ***Knowledge sharing***

We encourage people with similar interests to work together to solve problems

Policy and procedure instructions are frequently updated in the organization

Modern techniques and ways to involve all employees in solving quality-related problems are often used in the organization

#### ***Knowledge application***

Our organization is able to implement marketing plans effectively

Our organization quickly obtains information about new technological developments, which could affect the business

Our organization changes technical strategies frequently

Our organization quickly obtains important information about the competition

### **Green innovation**

#### ***Green technological innovation***

Whenever possible, our organization uses materials that can be easily recycled, reused and decomposed

Whenever possible, our organization uses less polluting or non-polluting/toxic materials, which are environmentally friendly

Managers in our organization redesign production and operational processes to improve environmental efficiency

### ***Green management innovation***

Managers implement advanced environmental management techniques within our organization

Managers implement advanced energy management in our organization

Managers implement knowledge management within our organization

### **Sustainable business**

#### ***Environmental sustainability***

Our organization responsibly stores tailings

Our organization strives to use technology, which reduces the emission of harmful gases

The production of our organization has a less harmful impact on the environment than in previous years

#### ***Social sustainability***

Our organization regularly communicates the company's environmental impacts and risks to the public

Our organization adheres to the occupational health and safety program

The leadership of our organization protects the demands and rights of indigenous people and the local community

#### ***Economic sustainability***

In our organization, profit maximization is still the most important goal

In recent years, in our organization, input costs have been reduced for the same level of output

In recent years, in our organization, waste management costs have been reduced for the same level of output

Our organization uses every opportunity to generate income from the sale of waste
